# Supplementary material for: White-tailed deer (Odocoileus virginianus) may serve as a wildlife reservoir for nearly extinct SARS-CoV-2 variants of concern
Source: PubMed Central journal article supplement — Proc Natl Acad Sci U S A. 2023 Jan 31;120(6):e2215067120. doi: 10.1073/pnas.2215067120 (PMC9963525; doi:10.1073/pnas.2215067120), 2023-01-31
Supplement: pnas.2215067120.sapp.pdf [file pnas.2215067120.sapp.pdf]

## Supporting Information for

White-tailed deer (*Odocoileus virginianus*) may serve as a wildlife reservoir for nearly extinct SARS-CoV-2 variants of concern

Leonardo C. Caserta, Mathias Martins, Salman L. Butt, Nicholas A. Hollingshead, Lina M. Covaleda, Sohel Ahmed, Mia Everts, Krysten L. Schuler, Diego G. Diel

Diego G. Diel

Email: [dgdiesel@cornell.edu](mailto:dgdiesel@cornell.edu)

### This PDF file includes:

Figures S1 to S3

Tables S1 to S8

SI References

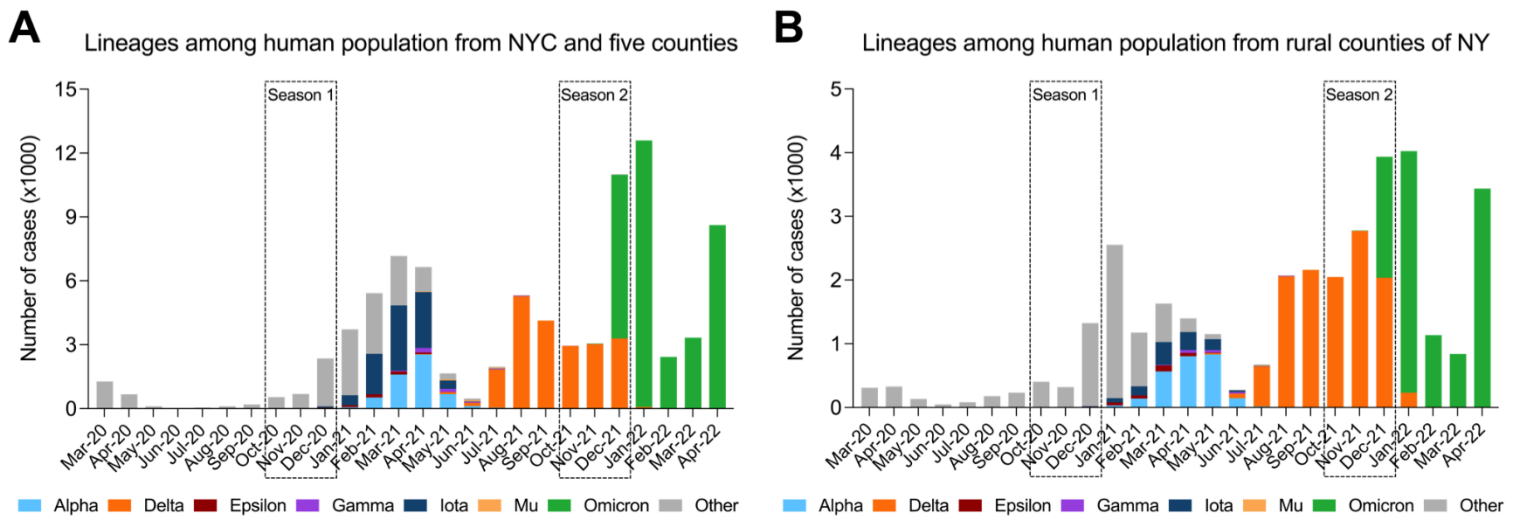

**Fig. S1.** Distribution of SARS-CoV-2 lineages across the rural and urban counties of State of New York (NY). (A) Daily distribution of SARS-CoV-2 human cases (March 2020 to April 2022) from urban counties in NY (NYC and five counties) and (B) rural counties in NY. The colored stacked bars represent proportion of each SARS-CoV-2 lineage. Total cases/sequences from March 2020 to April 2022 in NYC ( $n = 86,142$ ) or in rural NY ( $n = 34,686$ ).

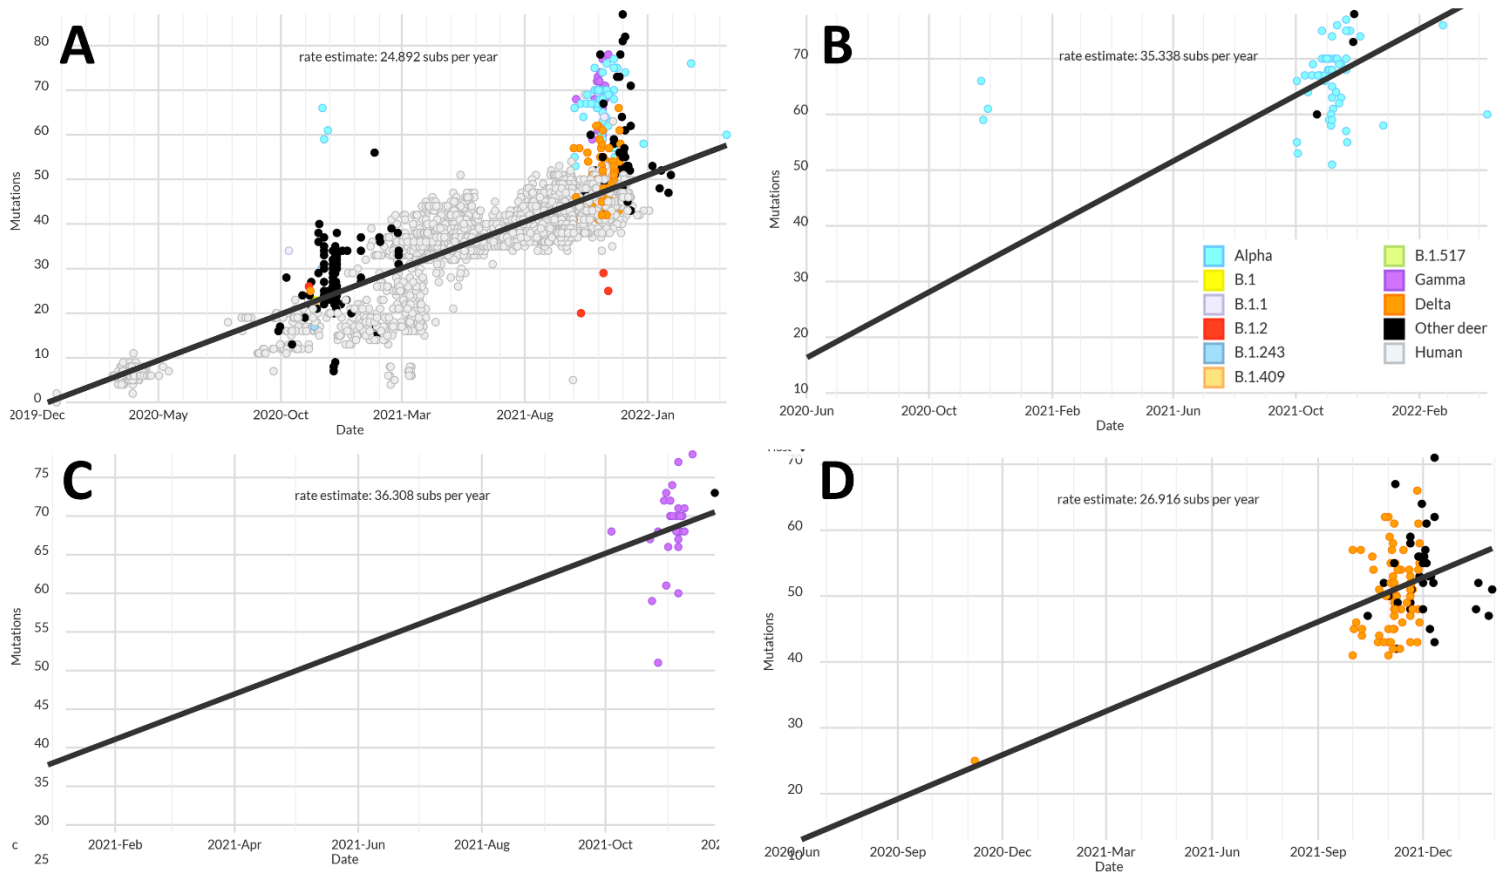

**Fig. S2.** Estimates of substitution rates per year. Colored dots (sky blue: Alpha; purple: Gamma and orange: Delta) represent SARS-CoV2 variants of concern (VOCs) derived from white-tailed deer (WTD) from this study, black dots represent the Pan-US SARS-CoV-2 sequences derived from WTD and grey dots represent SARS-CoV-2 sequences derived from human. The Y axis shows the number of mutations compared to the reference sequence Wuhan-1 (GenBank accession number MN908947.3). (A) Substitution rate of all WTD-derived sequences and 3,837 human-derived sequences, (B) Alpha VOC substitution rate in deer, (C) Gamma VOC substitution rate in deer and (D) Delta VOC substitution rate in deer.

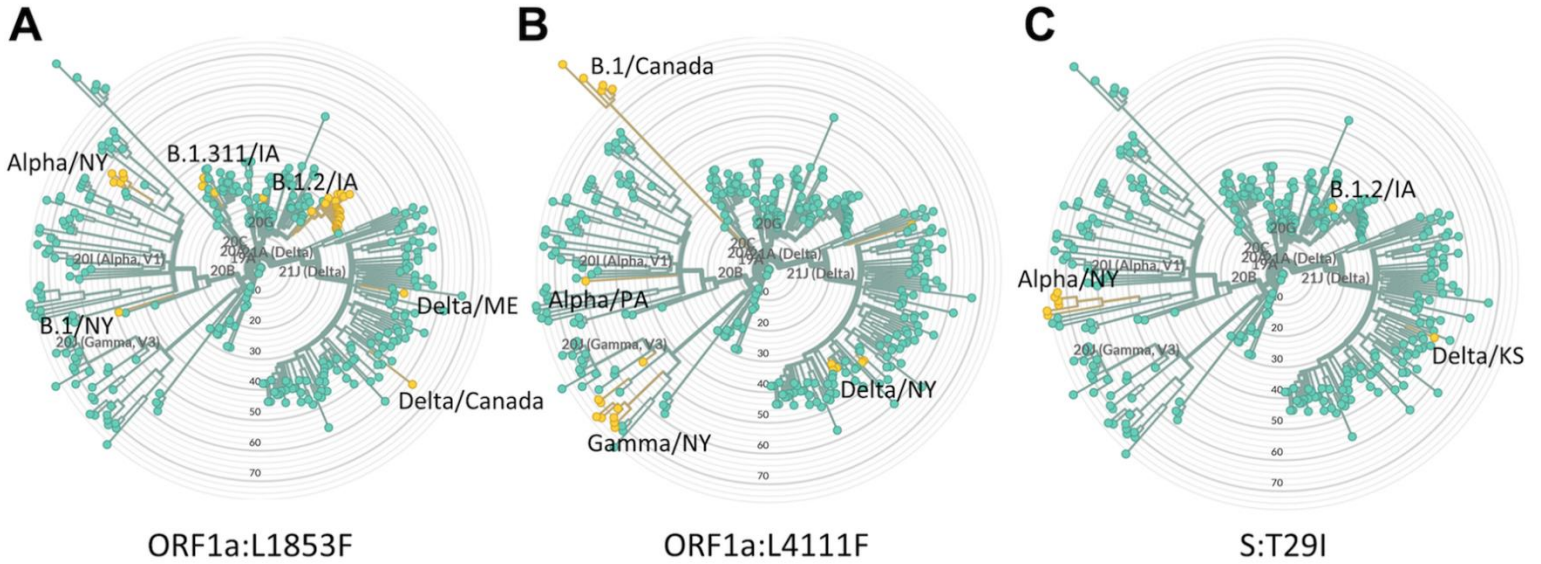

**Fig. S3** Potential host-adaptive mutations detected in WTD SARS-CoV-2 samples. Mutations highlighted were selected by homoplasy consistency index, prevalence in white-tailed deer (WTD) derived sequences and detection in multiple geographical regions. Yellow nodes represent sequences with the mutation and green nodes represent the original amino acid. The subclades or nodes where the potential host-adaptive mutations were detected are identified with labels describing the lineage and the state where the samples were collected. (A) Mutation ORF1a:L1853F, (B) mutation ORF1a:L4111F, and (C) mutation S:T29I

**Table S1.** Number of retropharyngeal lymph nodes from white-tailed deer tested in each county in the State of New York (NY) in Seasons 1 (September - December 2020, n = 2700) and Seasons 2 (September - December 2021, n = 2762).

| <b>County</b> | <b>Tested 2020</b> | <b>Positive 2020</b> | <b>Tested 2021</b> | <b>Positive 2021</b> |
|---------------|--------------------|----------------------|--------------------|----------------------|
| Albany        | 19                 | 0                    | 12                 | 4                    |
| Allegany      | 157                | 0                    | 148                | 70                   |
| Broome        | 98                 | 0                    | 97                 | 14                   |
| Cattaraugus   | 115                | 0                    | 143                | 32                   |
| Cayuga        | 48                 | 0                    | 42                 | 11                   |
| Chautauqua    | 123                | 0                    | 228                | 62                   |
| Chemung       | 75                 | 1                    | 82                 | 16                   |
| Chenango      | 56                 | 0                    | 52                 | 12                   |
| Clinton       | 69                 | 0                    | 56                 | 1                    |
| Columbia      | 33                 | 0                    | 33                 | 4                    |
| Cortland      | 27                 | 0                    | 21                 | 1                    |
| Delaware      | 77                 | 1                    | 78                 | 0                    |
| Dutchess      | 43                 | 0                    | 31                 | 5                    |
| Erie          | 109                | 0                    | 84                 | 17                   |
| Essex         | 32                 | 0                    | 40                 | 7                    |
| Franklin      | 35                 | 0                    | 24                 | 2                    |
| Fulton        | 7                  | 0                    | 12                 | 0                    |
| Genesee       | 45                 | 0                    | 32                 | 5                    |
| Greene        | 23                 | 0                    | 61                 | 2                    |
| Hamilton      | 7                  | 0                    | 9                  | 1                    |
| Herkimer      | 28                 | 0                    | 20                 | 0                    |
| Jefferson     | 42                 | 0                    | 39                 | 8                    |
| Lewis         | 30                 | 0                    | 22                 | 10                   |
| Livingston    | 52                 | 0                    | 69                 | 23                   |
| Madison       | 38                 | 0                    | 39                 | 10                   |
| Monroe        | 41                 | 2                    | 43                 | 9                    |
| Montgomery    | 16                 | 0                    | 10                 | 0                    |
| Nassau        |                    |                      | 5                  | 0                    |
| Niagara       | 65                 | 0                    | 39                 | 4                    |
| Oneida        | 65                 | 0                    | 55                 | 6                    |

|                 |     |   |     |    |
|-----------------|-----|---|-----|----|
| Onondaga        | 55  | 0 | 49  | 9  |
| Ontario         | 85  | 0 | 40  | 7  |
| Orange          | 66  | 0 | 70  | 32 |
| Orleans         | 32  | 1 | 31  | 6  |
| Oswego          | 64  | 0 | 46  | 2  |
| Otsego          | 29  | 0 | 35  | 8  |
| Putnam          | 13  | 0 | 17  | 0  |
| Rensselaer      | 24  | 0 | 53  | 12 |
| Rockland        | 5   | 0 | 27  | 2  |
| Saratoga        | 16  | 0 | 24  | 0  |
| Schenectady     | 10  | 0 | 7   | 0  |
| Schoharie       | 26  | 0 | 29  | 3  |
| Schuyler        | 21  | 0 | 22  | 3  |
| Seneca          | 50  | 0 | 29  | 1  |
| St.<br>Lawrence | 49  | 0 | 37  | 5  |
| Steuben         | 120 | 4 | 143 | 30 |
| Suffolk         | 24  | 0 | 23  | 1  |
| Sullivan        | 64  | 2 | 97  | 45 |
| Tioga           | 44  | 0 | 60  | 19 |
| Tompkins        | 29  | 0 | 33  | 12 |
| Ulster          | 41  | 1 | 47  | 14 |
| Warren          | 13  | 0 | 13  | 0  |
| Washington      | 40  | 0 | 56  | 4  |
| Wayne           | 52  | 0 | 52  | 10 |
| Westchester     | 24  | 0 | 58  | 1  |
| Wyoming         | 59  | 0 | 55  | 15 |
| Yates           | 24  | 0 | 22  | 1  |

**Table S2.** The presence of SARS-CoV-2 in white-tailed deer in the State of New York has been observed in spatial clusters in the hunting Season 2 (September - December 2021)<sup>1</sup>.

| cluster | Total IUMPS <sup>2</sup> | Radius (Km) | Observed (O) | Expected (E) | O/E   | Relative Risk (RR) | Log-Likelihood Ratio | p-Value <sup>3</sup> |
|---------|--------------------------|-------------|--------------|--------------|-------|--------------------|----------------------|----------------------|
| C1      | 29                       | 55.31       | 89           | 36.86        | 2.41  | 2.68               | 41.029               | <0.001               |
| C2      | 14                       | 21.70       | 56           | 22.12        | 2.53  | 2.70               | 27.62                | <0.001               |
| C3      | 57                       | 67.98       | 0            | 20.85        | 0     | 0                  | 23.91                | <0.001               |
| C4      | 22                       | 34.75       | 0            | 19.59        | 0     | 0                  | 22.43                | <0.001               |
| C5      | 26                       | 80.43       | 1            | 19.80        | 0.049 | 1.1                | 18.42                | <0.001               |
| C6      | 20                       | 64.38       | 0            | 15.38        | 0     | 0                  | 17.53                | <0.001               |
| C7      | 17                       | 21.17       | 30           | 11.79        | 2.54  | 2.63               | 14.58                | <0.001               |
| C8      | 6                        | 17.89       | 14           | 4.21         | 3.32  | 3.38               | 11.11                | 0.016                |
| C9      | 12                       | 25.18       | 0            | 9.27         | 0     | 0                  | 10.50                | 0.040                |
| C10     | 24                       | 36.33       | 1            | 10.95        | 0.091 | 0.090              | 8.79                 | 0.154                |
| C11     | 20                       | 28.30       | 2            | 13.06        | 0.15  | 0.15               | 8.60                 | 0.164                |
| C12     | 17                       | 27.21       | 50           | 29.49        | 1.70  | 1.76               | 8.42                 | 0.187                |
| C13     | 7                        | 16.99       | 13           | 4.63         | 2.81  | 2.85               | 7.54                 | 0.404                |
| C14     | 12                       | 22.57       | 7            | 6.11         | 0     | 0                  | 6.90                 | 0.585                |
| C15     | 8                        | 19.84       | 0            | 5.05         | 0     | 0                  | 5.70                 | 0.921                |
| C16     | 12                       | 29.41       | 0            | 4.63         | 0     | 0                  | 5.22                 | 0.983                |
| C17     | 10                       | 20.02       | 1            | 6.5          | 0.14  | 0.14               | 4.68                 | 0.996                |
| C18     | 3                        | 10.66       | 8            | 2.95         | 2.71  | 2.74               | 4.83                 | 0.999                |
| C19     | 13                       | 46.33       | 1            | 6.53         | 0.15  | 0.15               | 4.26                 | 0.999                |

<sup>1</sup> Results of the spatial clusters model

<sup>2</sup> IUMPS (Internal database ID for unique towns from the IPUMS geospatial dataset, which is based on the US Census TIGER data)

<sup>3</sup> Statistically significant at  $p \leq 0.005$ .

**Table S3.** Results of the logistic regression model using demographic and seasonal factors for SARS-CoV-2 testing in white-tailed deer positive in the State of New York, Season 1 (September - December 2020) and Season 2 (September - December 2021)<sup>1</sup>.

| Response Variable | Predictor variables | OR <sup>2</sup> | 95% CI <sup>3</sup> | P-Value <sup>4</sup> |
|-------------------|---------------------|-----------------|---------------------|----------------------|
| Testing Result    | Season 2021-22      | 59.04           | 34.83-111.08        | <0.01                |
|                   | Yearling            | 0.865           | 0.70-1.059          | 0.164                |
|                   | Male                | 1.952           | 1.591-2.407         | <0.01                |
| Testing Result    | Yearling            | 0.876           | 0.711-1.07          | 0.210                |
|                   | Male                | 1.906           | 1.55-2.355          | <0.01                |

<sup>1</sup> Outcome (N = SARS-CoV-2 cases from 5,462 deer samples)

<sup>2</sup> OR- Odds ratio

<sup>3</sup> CI- Confidence Interval of the OR

<sup>4</sup> Statistically significant at P≤0.05



**Table S4.** Mutations above 4% frequency in each variant of concern (VOC) detected in the spike gene of New York (NY) white-tailed deer (WTD) SARS-CoV-2 with frequencies < 1% in GISAID database.

| Lineage | nt. position | Region | a.a mutation | Proportion in VOC of NY WTD <sup>1</sup> | Number of GISAID sequences with the mutation <sup>2</sup> | Proportion in lineage or sublineages |
|---------|--------------|--------|--------------|------------------------------------------|-----------------------------------------------------------|--------------------------------------|
| Alpha   | 21604        | S      | Q14H         | 9.3                                      | 7258                                                      | <0.5%                                |
| Delta   | 21635        | S      | P25S         | 6                                        | 4331                                                      | 1%                                   |
| Alpha   | 21648        | S      | T29I         | 9.3                                      | 10751                                                     | <0.5%                                |
| Delta   | 21806        | S      | P82T         | 6.3                                      | 1021                                                      | 1%                                   |
| Alpha   | 21853        | S      | K97N         | 8.3                                      | 2995                                                      | <0.5%                                |
| Alpha   | 21969        | S      | C136S        | 11.4                                     | 50                                                        | <0.5%                                |
| Alpha   | 22095        | S      | D178G        | 6.7                                      | 1095                                                      | <0.5%                                |
| Alpha   | 22115        | S      | N185D        | 10.9                                     | 1622                                                      | <0.5%                                |
| Alpha   | 22118        | S      | F186L        | 15.6                                     | 1159                                                      | <0.5%                                |
| Alpha   | 22336        | S      | W258C        | 27.8                                     | 441                                                       | <0.5%                                |
| Alpha   | 22896        | S      | V445A        | 6.3                                      | 738                                                       | <0.5%                                |
| Gamma   | 23253        | S      | Q564L        | 40.7                                     | 167                                                       | <0.5%                                |
| Alpha   | 23264        | S      | D568N        | 5.5                                      | 297                                                       | <0.5%                                |
| Alpha   | 23268        | S      | I569T        | 5.5                                      | 109                                                       | <0.5%                                |
| Delta   | 23609        | S      | R683W        | 5.7                                      | 1516                                                      | <0.5%                                |
| Alpha   | 24054        | S      | A831V        | 7.3                                      | 5776                                                      | <0.5%                                |
| Gamma   | 24086        | S      | G842S        | 11.1                                     | 1611                                                      | <0.5%                                |
| Gamma   | 24372        | S      | S937L        | 7.7                                      | 37                                                        | <0.5%                                |
| Alpha   | 24914        | S      | D1118Y       | 12.7                                     | 6222                                                      | <0.5%                                |
| Alpha   | 25169        | S      | L1203F       | 7.3                                      | 2256                                                      | <0.5%                                |
| Delta   | 25169        | S      | L1203F       | 4.3                                      | 2256                                                      | 1%                                   |
| Alpha   | 25184        | S      | Q1208E       | 7.3                                      | 515                                                       | <0.5%                                |
| Alpha   | 25317        | S      | S1252F       | 16.4                                     | 9185                                                      | <0.5%                                |

<sup>1</sup> Proportion in sequences obtained in the present study

<sup>2</sup> As of June 6th 2022

**Table S5.** Mutations above 30% frequency in each variant of concern (VOC) of New York (NY) white-tailed deer (WTD) SARS-CoV-2 with frequencies < 1% in GISAID database.

| Lineage | Nt. position | Region | A.a mutation | Proportion in VOC of NY WTD <sup>1</sup> | Number of GISAID sequences with the mutation <sup>2</sup> | Proportion in lineage or sublineages |
|---------|--------------|--------|--------------|------------------------------------------|-----------------------------------------------------------|--------------------------------------|
| Alpha   | 2207         | Orf1a  | I648L        | 27.8                                     | 2116                                                      | <0.5%                                |
| Alpha   | 28011        | ORF8   | H40Y         | 38.5                                     | 3871                                                      | <0.5%                                |
| Gamma   | 2937         | Orf1a  | T891I        | 100                                      | 7882                                                      | 1%                                   |
| Gamma   | 6723         | Orf1a  | T2153I       | 44                                       | 7390                                                      | <0.5%                                |
| Gamma   | 11511        | Orf1a  | T3749I       | 33.3                                     | 1880                                                      | 1%                                   |
| Gamma   | 12596        | Orf1a  | L4111F       | 33.3                                     | 1374                                                      | <0.5%                                |
| Gamma   | 14575        | Orf1b  | A370S        | 100                                      | 1154                                                      | <0.5%                                |
| Gamma   | 17738        | Orf1b  | T1424I       | 55.6                                     | 2443                                                      | <0.5%                                |

<sup>1</sup> Proportion in sequences obtained in the present study

<sup>2</sup> As of June 6<sup>th</sup> 2022

**Table S6.** Homoplasious mutations detected in this study and other studies, with frequencies detected in New York (NY) white-tailed deer (WTD).

| Lineage | nt position | Region | a.a mutation | Proportion in VOC of NY WTD <sup>1</sup> | Reference <sup>2</sup> |
|---------|-------------|--------|--------------|------------------------------------------|------------------------|
| Alpha   | 5822        | Orf1a  | L1853F       | 9.1                                      | (1), (2)               |
| Alpha   | 9510        | Orf1a  | T3082I       | 1.9                                      | (1)                    |
| Alpha   | 9510        | Orf1a  | 3082         | 1.9                                      | (1)                    |
| Gamma   | 9711        | Orf1a  | S3149F       | 12                                       | (1)                    |
| Delta   | 9711        | Orf1a  | S3149F       | 2.9                                      | (1)                    |
| Delta   | 9714        | Orf1a  | T3150I       | 1.4                                      | Present study          |
| Alpha   | 11195       | Orf1a  | L3644F       | 14                                       | (1)                    |
| Delta   | 11195       | Orf1a  | L3644F       | 1.4                                      | (1)                    |
| Alpha   | 15451       | Orf1b  | G662S        | 1.8                                      | (1)                    |
| Gamma   | 21618       | S      | T19I         | 34.6                                     | (1)                    |
| Delta   | 21635       | S      | P25S         | 6                                        | Present study          |
| Alpha   | 21648       | S      | T29I         | 9.3                                      | Present study          |
| Delta   | 25563       | ORF3a  | Q57H         | 1.4                                      | (1)                    |

<sup>1</sup> Proportion within VOC in sequences obtained in the present study

<sup>2</sup> Study that identified mutation as homoplasious

**Table S7.** Detection of mutations close to variant of concern (VOC) defining mutations in the SARS-CoV-2 spike gene.

| Lineage | a.a mutation in the spike of NY WTD SARS-CoV-2 | Proportion in VOC of NY WTD <sup>1</sup> | VOC spike defining mutation |
|---------|------------------------------------------------|------------------------------------------|-----------------------------|
| Alpha   | D1118Y                                         | 12.7%                                    | D1118H                      |
| Alpha   | C136S                                          | 50%                                      | D138H                       |
| Alpha   | D568N                                          | 5.5%                                     | A570D                       |
| Alpha   | I569T                                          | 5.5%                                     | A570D                       |
| Delta   | R683W                                          | 5.7%                                     | P681R                       |

<sup>1</sup> Proportion within VOC in sequences obtained in the present study

**Table S8.** Metadata table of samples used in the present study.

| Short ID | GISAID accession number | Genbank accession number | Date       | Country | State    | County | Town            | Cluster | Sex | Lineage classification |
|----------|-------------------------|--------------------------|------------|---------|----------|--------|-----------------|---------|-----|------------------------|
| 119428   | EPI_ISL_13610627        | OP006287                 | 2021-11-03 | USA     | New York | STEU   | Cohocton        |         | M   | Alpha                  |
| 119438   | EPI_ISL_13610615        | OP006288                 | 2021-10-30 | USA     | New York | ALLE   | Friendship      | C2      | M   | Gamma                  |
| 119457   | EPI_ISL_13610654        | OP006289                 | 2021-11-07 | USA     | New York | LIVI   | Dansville       | C7      | M   | Alpha                  |
| 119459   | EPI_ISL_13610602        | OP006290                 | 2021-10-17 | USA     | New York | LIVI   | North Dansville | C7      | M   | Alpha                  |
| 119471   | EPI_ISL_13610640        | OP006291                 | 2021-11-06 | USA     | New York | WYOM   | Attica          |         | M   | Delta                  |
| 119478   | EPI_ISL_13610603        | OP006292                 | 2021-10-18 | USA     | New York | LIVI   | Ossian          | C7      | M   | Alpha                  |
| 119480   | EPI_ISL_13610610        | OP006293                 | 2021-10-27 | USA     | New York | LIVI   | Geneseo         |         | M   | Alpha                  |
| 119505   | EPI_ISL_13610625        | OP006294                 | 2021-11-02 | USA     | New York | ALLE   | Burns           | C7      | M   | Alpha                  |
| 119521   | EPI_ISL_13610663        | OP006295                 | 2021-11-09 | USA     | New York | ALLE   | Amity           | C2      | M   | Gamma                  |
| 119555   | EPI_ISL_13610611        | OP006296                 | 2021-10-27 | USA     | New York | ALLE   | Belfast         | C2      | M   | Gamma                  |
| 119558   | EPI_ISL_13610621        | OP006297                 | 2021-11-01 | USA     | New York | SULL   | Delaware        | C1      | M   | Delta                  |
| 119559   | EPI_ISL_13610655        | OP006298                 | 2021-11-07 | USA     | New York | ALLE   | Wellsville      | C2      | M   | Gamma                  |
| 119567   | EPI_ISL_13610667        | OP006299                 | 2021-11-11 | USA     | New York | ORAN   | Montgomery      | C1      | M   | Alpha                  |
| 119591   | EPI_ISL_13610613        | OP006300                 | 2021-10-28 | USA     | New York | SULL   | Delaware        | C1      | M   | Delta                  |
| 119607   | EPI_ISL_13658779        | OP006301                 | 2021-10-27 | USA     | New York | ULST   | Pine Bush       | C1      | M   | Alpha                  |
| 119611   | EPI_ISL_13610628        | OP006302                 | 2021-11-03 | USA     | New York | ORAN   | Warwick         | C1      | M   | Delta                  |
| 119627   | EPI_ISL_13610678        | OP006303                 | 2021-11-20 | USA     | New York | ORAN   | Montgomery      | C1      | M   | Alpha                  |
| 119639   | EPI_ISL_13610626        | OP006304                 | 2021-11-02 | USA     | New York | ALLE   | Scio            | C2      | M   | Gamma                  |
| 119640   | EPI_ISL_13610605        | OP006305                 | 2021-10-23 | USA     | New York | ALLE   | Alma            | C2      | M   | Gamma                  |
| 119642   | EPI_ISL_13610664        | OP006306                 | 2021-11-09 | USA     | New York | ALLE   | Amity           | C2      | M   | Gamma                  |
| 119770   | EPI_ISL_13658805        | OP006307                 | 2021-11-19 | USA     | New York | DUTC   | Verbank         |         | M   | Delta                  |
| 119777   | EPI_ISL_13658806        | OP006308                 | 2021-11-20 | USA     | New York | ULST   | New Paltz       |         | F   | Alpha                  |
| 119785   | EPI_ISL_13610591        | OP006309                 | 2021-10-02 | USA     | New York | BROO   | Conklin         |         | F   | Delta                  |
| 119867   | EPI_ISL_13610696        | OP006310                 | 2021       | USA     | New York | MADI   | Sullivan        |         | F   | Alpha                  |
| 119941   | EPI_ISL_13658817        | OP006311                 | 2021       | USA     | New York | RENS   |                 |         | F   | Alpha                  |
| 119945   | EPI_ISL_13610641        | OP006312                 | 2021-11-06 | USA     | New York | TOMP   | Ithaca          | C18     | M   | Delta                  |
| 119983   | EPI_ISL_13610642        | OP006313                 | 2021-11-06 | USA     | New York | TOMP   | Danby           | C13     | M   | Alpha                  |
| 119988   | EPI_ISL_13658807        | OP006314                 | 2021-11-20 | USA     | New York | CHEN   | Sherburne       |         | F   | Alpha                  |
| 119997   | EPI_ISL_13610659        | OP006315                 | 2021-11-08 | USA     | New York | TIOG   | Owego           |         | M   | Alpha                  |
| 140996   | EPI_ISL_13610693        | OP006316                 | 2021-11-28 | USA     | New York | SULL   | Cochecton       | C1      | F   | Delta                  |
| 147551   | EPI_ISL_13610614        | OP006317                 | 2021-10-29 | USA     | New York | LEWI   | Martinsburg     | C8      | M   | Delta                  |
| 149738   | EPI_ISL_13610691        | OP006318                 | 2021-11-27 | USA     | New York | TOMP   | Ulysses         | C18     | M   | Delta                  |
| 149792   | EPI_ISL_13658808        | OP006319                 | 2021-11-20 | USA     | New York | OTSE   | Roseboom        |         | M   | Delta                  |
| 149832   | EPI_ISL_13658813        | OP006320                 | 2021-11-24 | USA     | New York | ORAN   | Hamptonburgh    | C1      | M   | Alpha                  |
| 149844   | EPI_ISL_13658816        | OP006321                 | 2021-11-28 | USA     | New York | SCHO   | Jefferson       |         | M   | Delta                  |
| 149845   | EPI_ISL_13610688        | OP006322                 | 2021-11-22 | USA     | New York | ORAN   | Vails Gate      | C1      | M   | Delta                  |
| 149849   | EPI_ISL_13610689        | OP006323                 | 2021-11-22 | USA     | New York | ORAN   | Montgomery      | C1      | M   | Alpha                  |
| 149911   | EPI_ISL_13610599        | OP006324                 | 2021-10-10 | USA     | New York | RENS   | East Greenbush  |         | M   | Alpha                  |
| 149932   | EPI_ISL_13610670        | OP006325                 | 2021-11-13 | USA     | New York | ONON   | Manlius         |         | M   | Alpha                  |
| 149937   | EPI_ISL_13610588        | OP006326                 | 2020-11-22 | USA     | New York | MADI   | Sullivan        |         | M   | Alpha                  |

|        |                  |          |            |     |          |          |               |     |   |  |         |
|--------|------------------|----------|------------|-----|----------|----------|---------------|-----|---|--|---------|
| 149959 | EPI_ISL_13610697 | OP006327 | 2021       | USA | New York |          |               |     |   |  | Alpha   |
| 149982 | EPI_ISL_13610671 | OP006328 | 2021-11-13 | USA | New York | CHAU     | Portland      |     | M |  | Delta   |
| 149990 | EPI_ISL_13610668 | OP006329 | 2021-11-11 | USA | New York | CHAU     | Charlotte     |     | M |  | Delta   |
| 152918 | EPI_ISL_13658777 | OP006330 | 2021-10-02 | USA | New York | ERIE     | Orchard Park  |     | M |  | Alpha   |
| 154944 | EPI_ISL_13610593 | OP006331 | 2021-10-03 | USA | New York | ALBA     | Voorheesville |     | M |  | Alpha   |
| 155877 | EPI_ISL_13610592 | OP006332 | 2021-10-02 | USA | New York | LIVI     | Portage       | C7  | M |  | Alpha   |
| 155912 | EPI_ISL_13658814 | OP006333 | 2021-11-26 | USA | New York | SULL     | Callicoon     | C1  | M |  | Delta   |
| 155994 | EPI_ISL_13610616 | OP006334 | 2021-10-30 | USA | New York | CAYU     | Aurelius      |     | M |  | Delta   |
| 158016 | EPI_ISL_13610619 | OP006335 | 2021-10-31 | USA | New York | ALLE     | Wirt          | C2  | M |  | Gamma   |
| 158035 | EPI_ISL_13610677 | OP006336 | 2021-11-17 | USA | New York | CHAU     | Carroll       | C12 | M |  | Delta   |
| 158072 | EPI_ISL_13610698 | OP006337 | 2021       | USA | New York | CATT     | Mansfield     |     | M |  | Delta   |
| 158076 | EPI_ISL_13658818 | OP006338 | 2021       | USA | New York | CATT     | Perrysburg    |     | F |  | Alpha   |
| 159048 | EPI_ISL_13610586 | OP006339 | 2020-11-13 | USA | New York | Sullivan | Liberty       | C1  | M |  | B.1.409 |
| 159201 | EPI_ISL_13610584 | OP006340 | 2020-11-12 | USA | New York | Greene   | Leeds         |     | M |  | B.1.243 |
| 159212 | EPI_ISL_13610587 | OP006341 | 2020-11-21 | USA | New York | Ulster   | Saugerties    |     | M |  | B.1.243 |
| 161392 | EPI_ISL_13610582 | OP006342 | 2020-11-07 | USA | New York | Steuben  | Addison       |     | M |  | Delta   |
| 161809 | EPI_ISL_13610699 | OP006343 | 2020       | USA | New York | Columbia | Ancram        |     | F |  | B.1.517 |
| 161864 | EPI_ISL_13658781 | OP006344 | 2021-11-01 | USA | New York | ORAN     | Chester       | C1  | M |  | Delta   |
| 161956 | EPI_ISL_13658787 | OP006345 | 2021-11-03 | USA | New York | ALLE     | Amity         | C2  | M |  | Gamma   |
| 161965 | EPI_ISL_13610633 | OP006346 | 2021-11-05 | USA | New York | ALLE     | Amity         | C2  | M |  | Gamma   |
| 162299 | EPI_ISL_13610580 | OP006347 | 2020-10-11 | USA | New York | Orleans  | Carlton       |     | F |  | B.1.1   |
| 162885 | EPI_ISL_13610581 | OP006348 | 2020-11-05 | USA | New York | Chemung  | Horseheads    |     | M |  | B.1.2   |
| 162900 | EPI_ISL_13610583 | OP006349 | 2020-11-07 | USA | New York | Monroe   | Henrietta     |     | M |  | B.1.1   |
| 162948 | EPI_ISL_13610600 | OP006350 | 2021-10-10 | USA | New York | Steuben  | Campbell      |     | M |  | B.1.2   |
| 162950 | EPI_ISL_13610585 | OP006351 | 2020-11-12 | USA | New York | Steuben  | Lindley       |     | M |  | B.1     |
| 163183 | EPI_ISL_13610675 | OP006352 | 2021-11-14 | USA | New York | ONEI     | Trenton       |     | M |  | Delta   |
| 163188 | EPI_ISL_13658801 | OP006353 | 2021-11-10 | USA | New York | ONEI     | Whitestown    |     | M |  | Alpha   |
| 163192 | EPI_ISL_13610672 | OP006354 | 2021-11-13 | USA | New York | ONEI     | Westmoreland  |     | M |  | Alpha   |
| 164040 | EPI_ISL_13610597 | OP006355 | 2021-10-09 | USA | New York | CHAU     | North Harmony | C12 | M |  | Delta   |
| 164122 | EPI_ISL_13610601 | OP006356 | 2021-10-13 | USA | New York | LIVI     | Sparta        | C7  | F |  | Alpha   |
| 164135 | EPI_ISL_13610598 | OP006357 | 2021-10-09 | USA | New York | ORLE     | Ridgeway      |     | F |  | Delta   |
| 164175 | EPI_ISL_13610604 | OP006358 | 2021-10-19 | USA | New York | GENE     | Pembroke      |     | M |  | Delta   |
| 164255 | EPI_ISL_13658780 | OP006359 | 2021-10-30 | USA | New York | ERIE     | Aurora        |     | F |  | Alpha   |
| 164331 | EPI_ISL_13658778 | OP006360 | 2021-10-23 | USA | New York | CHAU     | Busti         | C12 | M |  | Alpha   |
| 164343 | EPI_ISL_13610606 | OP006361 | 2021-10-23 | USA | New York | CHAU     | North Harmony | C12 | F |  | Delta   |
| 164345 | EPI_ISL_13610607 | OP006362 | 2021-10-24 | USA | New York | ALLE     | Cuba          | C2  | M |  | Gamma   |
| 164384 | EPI_ISL_13610617 | OP006363 | 2021-10-30 | USA | New York | ALLE     | Wellsville    | C2  | F |  | Alpha   |
| 164389 | EPI_ISL_13610612 | OP006364 | 2021-10-27 | USA | New York | ALLE     | Bolivar       | C2  | F |  | Gamma   |
| 164395 | EPI_ISL_13610608 | OP006365 | 2021-10-24 | USA | New York | WAYN     | Butler        |     | M |  | Delta   |
| 164412 | EPI_ISL_13610622 | OP006366 | 2021-11-01 | USA | New York | CHAU     | Poland        | C12 | M |  | Alpha   |
| 164447 | EPI_ISL_13658782 | OP006367 | 2021-11-02 | USA | New York | ERIE     | Newstead      |     | F |  | Delta   |
| 164453 | EPI_ISL_13610643 | OP006368 | 2021-11-06 | USA | New York | ALLE     | Wirt          | C2  | M |  | Gamma   |
| 164458 | EPI_ISL_13610618 | OP006369 | 2021-10-30 | USA | New York | TIOG     | Spencer       | C13 | M |  | Alpha   |
| 164463 | EPI_ISL_13610620 | OP006370 | 2021-10-31 | USA | New York | ALLE     | Wirt          | C2  | M |  | Gamma   |
| 164465 | EPI_ISL_13610644 | OP006371 | 2021-11-06 | USA | New York | ALLE     | Bolivar       | C2  | M |  | Gamma   |

|        |                  |          |            |     |          |      |               |     |   |       |
|--------|------------------|----------|------------|-----|----------|------|---------------|-----|---|-------|
| 164468 | EPI_ISL_13658792 | OP006372 | 2021-11-06 | USA | New York | CHAU | Busti         | C12 | M | Alpha |
| 164472 | EPI_ISL_13658788 | OP006373 | 2021-11-03 | USA | New York | CHAU | North Harmony | C12 | M | Alpha |
| 164477 | EPI_ISL_13610656 | OP006374 | 2021-11-07 | USA | New York | CHAU | Chautauqua    |     | F | Delta |
| 164485 | EPI_ISL_13610629 | OP006375 | 2021-11-03 | USA | New York | CHAU | Clymer        |     | M | Delta |
| 164487 | EPI_ISL_13610630 | OP006376 | 2021-11-03 | USA | New York | CATT | Randolph      | C12 | M | Alpha |
| 164489 | EPI_ISL_13658793 | OP006377 | 2021-11-06 | USA | New York | CHAU | Kiantone      | C12 | M | Alpha |
| 164493 | EPI_ISL_13610594 | OP006378 | 2021-10-04 | USA | New York | ALLE | Cuba          | C2  | M | Gamma |
| 164507 | EPI_ISL_13658794 | OP006379 | 2021-11-06 | USA | New York | CHAU | Busti         | C12 | F | Delta |
| 164509 | EPI_ISL_13658799 | OP006380 | 2021-11-07 | USA | New York | CATT | East Otto     |     | M | Delta |
| 164510 | EPI_ISL_13658795 | OP006284 | 2021-11-06 | USA | New York | CHAU | Busti         | C12 | M | Delta |
| 164522 | EPI_ISL_13610634 | OP006381 | 2021-11-05 | USA | New York | ERIE | Aurora        |     | M | Alpha |
| 164523 | EPI_ISL_13610635 | OP006382 | 2021-11-05 | USA | New York | CHAU | Harmony       | C12 | F | Delta |
| 164525 | EPI_ISL_13610595 | OP006383 | 2021-10-04 | USA | New York | CHAU | Portland      |     | M | Delta |
| 164529 | EPI_ISL_13658783 | OP006384 | 2021-11-02 | USA | New York | ALLE | Amity         | C2  | F | Gamma |
| 164530 | EPI_ISL_13610636 | OP006385 | 2021-11-05 | USA | New York | CHAU | Chautauqua    |     | M | Delta |
| 164531 | EPI_ISL_13610589 | OP006386 | 2021-10-01 | USA | New York | CHAU | Chautauqua    |     | M | Delta |
| 164533 | EPI_ISL_13658800 | OP006387 | 2021-11-07 | USA | New York | MONR | Rush          |     | M | Alpha |
| 164544 | EPI_ISL_13610645 | OP006388 | 2021-11-06 | USA | New York | ALLE | Angelica      |     | M | Gamma |
| 164548 | EPI_ISL_13610657 | OP006389 | 2021-11-07 | USA | New York | ALLE | Willing       | C2  | M | Gamma |
| 164550 | EPI_ISL_13610590 | OP006390 | 2021-10-01 | USA | New York | CHAU | Chautauqua    |     | M | Delta |
| 164553 | EPI_ISL_13610660 | OP006391 | 2021-11-08 | USA | New York | ALLE | Wirt          | C2  | M | Gamma |
| 164557 | EPI_ISL_13658796 | OP006392 | 2021-11-06 | USA | New York | CHAU | Busti         | C12 | M | Alpha |
| 164565 | EPI_ISL_13610623 | OP006393 | 2021-11-01 | USA | New York | STEU | Greenwood     |     | M | Gamma |
| 164571 | EPI_ISL_13658789 | OP006394 | 2021-11-04 | USA | New York | TOMP | Enfield       | C18 | M | Delta |
| 164572 | EPI_ISL_13610596 | OP006395 | 2021-10-08 | USA | New York | WYOM | Warsaw        |     | F | Delta |
| 164573 | EPI_ISL_13658784 | OP006396 | 2021-11-02 | USA | New York | CHAU | French Creek  |     | M | Delta |
| 164580 | EPI_ISL_13610646 | OP006397 | 2021-11-06 | USA | New York | CHAU | Chautauqua    |     | F | Delta |
| 164604 | EPI_ISL_13610647 | OP006398 | 2021-11-06 | USA | New York | WAYN | Galen         |     | F | Delta |
| 164628 | EPI_ISL_13610700 | OP006399 | 2021       | USA | New York | WYOM | Bennington    |     | F | Delta |
| 164637 | EPI_ISL_13610648 | OP006400 | 2021-11-06 | USA | New York | TOMP | Danby         | C13 | M | Delta |
| 164656 | EPI_ISL_13610631 | OP006401 | 2021-11-03 | USA | New York | CHAU | Westfield     |     | M | Delta |
| 164661 | EPI_ISL_13610649 | OP006402 | 2021-11-06 | USA | New York | ALLE | Amity         | C2  | F | Gamma |
| 164669 | EPI_ISL_13610632 | OP006403 | 2021-11-03 | USA | New York | ALLE | Alma          | C2  | M | Gamma |
| 164672 | EPI_ISL_13610637 | OP006404 | 2021-11-05 | USA | New York | ALLE | Cuba          | C2  | M | Gamma |
| 164673 | EPI_ISL_13658797 | OP006405 | 2021-11-06 | USA | New York | ALLE | Cuba          | C2  | M | Gamma |
| 164676 | EPI_ISL_13610673 | OP006406 | 2021-11-13 | USA | New York | ALLE | Scio          | C2  | M | Gamma |
| 164702 | EPI_ISL_13610661 | OP006407 | 2021-11-08 | USA | New York | CHEM | Baldwin       | C13 | M | Delta |
| 164706 | EPI_ISL_13610638 | OP006408 | 2021-11-05 | USA | New York | GENE |               |     | M | Delta |
| 164707 | EPI_ISL_13610650 | OP006409 | 2021-11-06 | USA | New York | WYOM | Pike          | C7  | M | Alpha |
| 164709 | EPI_ISL_13610651 | OP006410 | 2021-11-06 | USA | New York | CATT | New Albion    |     | M | Delta |
| 164713 | EPI_ISL_13610676 | OP006411 | 2021-11-15 | USA | New York | TIOG | Spencer       | C13 | M | Alpha |
| 164717 | EPI_ISL_13658804 | OP006285 | 2021-11-15 | USA | New York | LIVI | Avon          |     | M | Alpha |
| 164723 | EPI_ISL_13658790 | OP006412 | 2021-11-05 | USA | New York | ALLE | Hume          | C7  | M | Alpha |
| 164729 | EPI_ISL_13658798 | OP006413 | 2021-11-06 | USA | New York | ALLE | Amity         | C2  | M | Gamma |
| 164730 | EPI_ISL_13610695 | OP006414 | 2021-12-27 | USA | New York | ALLE | Granger       | C7  | M | Alpha |

|        |                  |          |            |     |          |      |               |     |   |       |
|--------|------------------|----------|------------|-----|----------|------|---------------|-----|---|-------|
| 164733 | EPI_ISL_13658803 | OP006415 | 2021-11-12 | USA | New York | TOMP | Ulysses       | C18 | M | Delta |
| 164737 | EPI_ISL_13610652 | OP006416 | 2021-11-06 | USA | New York | CATT | Farmersville  |     | M | Alpha |
| 164739 | EPI_ISL_13658802 | OP006286 | 2021-11-11 | USA | New York | ALLE | Centerville   |     | M | Alpha |
| 164750 | EPI_ISL_13610658 | OP006418 | 2021-11-07 | USA | New York | WYOM | Perry         |     | M | B.1.2 |
| 164755 | EPI_ISL_13610639 | OP006419 | 2021-11-05 | USA | New York | WYOM | Pike          | C7  | M | Alpha |
| 164760 | EPI_ISL_13610653 | OP006420 | 2021-11-06 | USA | New York | CATT | Yorkshire     |     | M | Delta |
| 164770 | EPI_ISL_13610674 | OP006421 | 2021-11-13 | USA | New York | ALLE | Caneadea      |     | F | B.1.2 |
| 164777 | EPI_ISL_13610665 | OP006422 | 2021-11-09 | USA | New York | TOMP | Ulysses       | C18 | F | Delta |
| 164781 | EPI_ISL_13610662 | OP006423 | 2021-11-08 | USA | New York | CHEM | Baldwin       | C13 | F | B.1.1 |
| 164784 | EPI_ISL_13610669 | OP006424 | 2021-11-12 | USA | New York | CHAU | Bemus Point   |     | M | Delta |
| 165189 | EPI_ISL_13658791 | OP006417 | 2021-11-05 | USA | New York | SUFF | Southold      |     | M | Delta |
| 165273 | EPI_ISL_13610666 | OP006425 | 2021-11-10 | USA | New York | WASH | Fort Ann      |     | M | Delta |
| 165621 | EPI_ISL_13658785 | OP006426 | 2021-11-02 | USA | New York | TIOG | Spencer       | C13 | M | Alpha |
| 165628 | EPI_ISL_13610687 | OP006427 | 2021-11-21 | USA | New York | TIOG | Berkshire     |     | M | Alpha |
| 165672 | EPI_ISL_13658811 | OP006428 | 2021-11-21 | USA | New York | DUTC | Amenia        |     | M | Delta |
| 165681 | EPI_ISL_13658809 | OP006429 | 2021-11-20 | USA | New York | SULL | Bloomington   | C1  | F | Alpha |
| 165697 | EPI_ISL_13610679 | OP006430 | 2021-11-20 | USA | New York | SULL | Delaware      | C1  | F | Delta |
| 165707 | EPI_ISL_13610680 | OP006431 | 2021-11-20 | USA | New York | DUTC | Washington    |     | M | Delta |
| 165711 | EPI_ISL_13610681 | OP006432 | 2021-11-20 | USA | New York | SULL | Tusten        | C1  | M | Delta |
| 165715 | EPI_ISL_13610682 | OP006433 | 2021-11-20 | USA | New York | SULL | Tusten        | C1  | M | Delta |
| 165724 | EPI_ISL_13610692 | OP006434 | 2021-11-27 | USA | New York | ORAN | Chester       | C1  | F | Delta |
| 165726 | EPI_ISL_13658810 | OP006435 | 2021-11-20 | USA | New York | SULL | Cochecton     | C1  | F | Delta |
| 165733 | EPI_ISL_13610683 | OP006436 | 2021-11-20 | USA | New York | ONON | Cicero        |     | F | Alpha |
| 165741 | EPI_ISL_13610690 | OP006437 | 2021-11-26 | USA | New York | SULL | Thompson      | C1  | F | Delta |
| 165751 | EPI_ISL_13610701 | OP006438 | 2021       | USA | New York | SULL | Delaware      | C1  | M | Delta |
| 165776 | EPI_ISL_13610684 | OP006439 | 2021-11-20 | USA | New York | WAYN | Butler        |     | M | Delta |
| 165804 | EPI_ISL_13658812 | OP006440 | 2021-11-22 | USA | New York | ALBA | Medusa        |     | M | Delta |
| 165834 | EPI_ISL_13610685 | OP006441 | 2021-11-20 | USA | New York | TIOG | Newark Valley |     | M | Delta |
| 165887 | EPI_ISL_13610624 | OP006442 | 2021-11-01 | USA | New York | ONON | Camillus      |     | M | Delta |
| 165892 | EPI_ISL_13610686 | OP006443 | 2021-11-20 | USA | New York | TIOG | Owego         |     | M | Alpha |
| 165908 | EPI_ISL_13610702 | OP006444 | 2021       | USA | New York |      |               |     |   | Alpha |
| 165920 | EPI_ISL_13610694 | OP006445 | 2021-12-04 | USA | New York | TIOG | Owego         |     | F | Alpha |
| 165925 | EPI_ISL_13658815 | OP006446 | 2021-11-27 | USA | New York | CAYU | Throop        |     | F | Delta |
| 165954 | EPI_ISL_13610609 | OP006447 | 2021-10-24 | USA | New York | CHEN | Greene        |     | M | Delta |



## References

1. Tan CCS, Lam SD, Richard D, Owen CJ, Berchtold D, Orengo C, Nair MS, Kuchipudi S V., Kapur V, van Dorp L, Balloux F. 2022. Transmission of SARS-CoV-2 from humans to animals and potential host adaptation. *Nat Commun* 13:2988.
2. Sana Naderi, Peter Chen, Carmen Lía Murall, Raphael Poujol, Susanne Kraemer, Bradley S. Pickering, Selena M. Sagan BJS. 2022. Zoonothroponotic transmission of SARS-CoV-2 and host-specific viral mutations revealed by genome-wide phylogenetic analysis. *bioRxiv* <https://doi.org/https://doi.org/10.1101/2022.06.02.494559>.
